# Supplementary material
Source: Royal Society of Chemistry journal article supplement (doi:10.1039/d6dt00452k)
Supplement: d6dt00452k1.pdf [file d6dt00452k1.pdf]

# Electronic Supporting Information

## Dual-tuning birefringence in hybrid crystals via Cd/Zn metal centers and organic ligand isomerism

Yaoguo Shen,<sup>\*a</sup> Xinyi Wang,<sup>a</sup> Mengqing Wu,<sup>a</sup> Yiman Yang,<sup>a</sup> Lingxin Yan<sup>a</sup>

<sup>a</sup>College of Physics and Electronic Information Engineering, Minjiang University, Fuzhou, Fujian 350108, China

\*Email: shenyg@mju.edu.cn

### Contents

|                                                                                                            |     |
|------------------------------------------------------------------------------------------------------------|-----|
| Reagents .....                                                                                             | S2  |
| Synthesis of <b>4CdCl</b> , <b>4ZnCl</b> and <b>8CdCl</b> .....                                            | S2  |
| Single-Crystal Structure Determination.....                                                                | S2  |
| Thermal Stability Analysis.....                                                                            | S2  |
| UV-Vis-NIR Diffuse Reflectance Spectroscopy .....                                                          | S2  |
| Infrared Spectroscopy .....                                                                                | S2  |
| Computational Methods.....                                                                                 | S3  |
| Fig. S1. Thermal stability analysis of <b>4CdCl</b> , <b>4ZnCl</b> and <b>8CdCl</b> .....                  | S4  |
| Fig. S2. The UV-vis-NIR diffuse reflectance spectrum of <b>4CdCl</b> , <b>4ZnCl</b> and <b>8CdCl</b> ..... | S4  |
| Fig. S3. Electronic band structure of <b>4CdCl</b> , <b>4ZnCl</b> and <b>8CdCl</b> .....                   | S4  |
| Fig. S4. Infrared spectrum of <b>4CdCl</b> , <b>4ZnCl</b> and <b>8CdCl</b> .....                           | S5  |
| Fig. S5. The HOMO and LUMO diagram of protonated 4-bromoquinoline and 8-bromoquinoline.....                | S5  |
| Fig. S6. Experimental XRD patterns of <b>4CdCl</b> , <b>4ZnCl</b> and <b>8CdCl</b> .....                   | S5  |
| Table S1. Crystal Data and Structural Refinement for <b>4CdCl</b> , <b>4ZnCl</b> and <b>8CdCl</b> .....    | S6  |
| Table S2. Atomic Coordinates and Equivalent Isotropic Displacement Parameters.....                         | S8  |
| Table S3. Anisotropic Displacement Parameters.....                                                         | S10 |
| Table S4. Bond Lengths for <b>4CdCl</b> , <b>4ZnCl</b> and <b>8CdCl</b> .....                              | S11 |
| Table S5. Bond Angles for <b>4CdCl</b> , <b>4ZnCl</b> and <b>8CdCl</b> .....                               | S12 |
| Table S6. Torsion Angles for <b>4CdCl</b> , <b>4ZnCl</b> and <b>8CdCl</b> .....                            | S14 |
| Table S7. Hydrogen Atom and Isotropic Displacement Parameters.. ..                                         | S15 |
| Table S8. Birefringence Comparisons of Organic-Inorganic Hybrid Materials.....                             | S16 |
| References.....                                                                                            | S18 |

## Reagents

C<sub>9</sub>H<sub>6</sub>BrN (95%), C<sub>9</sub>H<sub>6</sub>BrN (97%), ZnF<sub>2</sub> (99%), CdCO<sub>3</sub> (97%) and HCl (36%~38%) were purchased from Aladdin and used as received.

## Synthesis of (C<sub>9</sub>H<sub>7</sub>NBr)CdCl<sub>3</sub>·H<sub>2</sub>O (named **4CdCl**), (C<sub>9</sub>H<sub>7</sub>NBr)<sub>2</sub>ZnCl<sub>4</sub> (named **4ZnCl**) and (C<sub>9</sub>H<sub>7</sub>NBr)<sub>2</sub>CdCl<sub>4</sub> (named **8CdCl**).

The purity of the obtained product is confirmed by the powder X-ray diffraction (XRD) patterns, which were taken on a Rigaku MiniFlex II diffractometer (Cu K $\alpha$  radiation) in the range of  $2\theta = 7^\circ - 70^\circ$  with a step width of  $0.01^\circ$  and a sampling rate of  $5^\circ \text{ min}^{-1}$ . The results agree well with the calculated XRD patterns from single-crystal XRD analyses (Figure S6).

## Single-Crystal Structure Determination

Transparent crystal **4CdCl** ( $0.05 \times 0.04 \times 0.04 \text{ mm}^3$ ), transparent crystal **4ZnCl** ( $0.09 \times 0.07 \times 0.04 \text{ mm}^3$ ), transparent crystal **8CdCl** ( $0.04 \times 0.02 \times 0.03 \text{ mm}^3$ ) and was selected using an optical microscope for single-crystal XRD analysis. The diffraction data were collected by using graphite-monochromatized Mo K $\alpha$  radiation ( $\lambda = 0.71073 \text{ \AA}$ ) at 297 (10) K on an Agilent SuperNova Dual diffractometer with an Atlas detector. The collection of the intensity data, cell refinement, and data reduction were carried out with the program CrysAlisPro.<sup>1</sup> Using Olex2,<sup>2</sup> the structure was solved with the olex2.solve<sup>3</sup> structure solution program using Charge Flipping and refined with the SHELXL<sup>4</sup> refinement package using Least Squares minimisation. Details of crystal parameters, data collection, and structure refinement are summarized in Table S1. The atomic coordinates and equivalent isotropic displacement parameters are listed in Table S2, and the anisotropic displacement parameters are listed in Table S3. The selected bond distances and angles are presented in Table S4–S5. Torsion Angles in Table S7. The hydrogen atom and isotropic displacement parameters in Table S8. Birefringent crystal statistical chart crystal size in Table S8.

## Thermal Stability Analysis

The thermogravimetric (TG) was carried out on a NETZSCH TG 209 F3 simultaneous analyzer. Approximately 10.8173 mg of **4CdCl**, 5.9299 mg of **4ZnCl** and 9.3524 mg of **8CdCl** were loaded into Al<sub>2</sub>O<sub>3</sub> crucibles and heated from room temperature to 300 °C at a rate of 10 °C min<sup>-1</sup> under a flowing nitrogen atmosphere.

## UV-Vis-NIR Diffuse Reflectance Spectroscopy

UV Vis NIR diffuse reflectance spectra were recorded on a PerkinElmer Lambda-1050 UV-Vis-NIR spectrophotometer. Measurements were performed from 220 to 800 nm using a certified white standard as the 100% reflectance reference. The reflectance data were converted to the absorption coefficient via the Kubelka–Munk function:  $F(R) = (1 - R)^2/2R$ ,<sup>5</sup> where R represents the measured reflectance.

## Infrared Spectroscopy

Infrared spectrum was measured on a Nicolet iS50FT-IR spectrometer with KBr pellets as a standard in the range of 4000~400 cm<sup>-1</sup>. At a mass ratio of 1:100 with dried KBr, samples of **4CdCl**, **4ZnCl** and **8CdCl** were separately processed. Each was ground thoroughly in an agate mortar and pressed into a thin pellet for subsequent measurement.

## Computational Methods

The first-principles calculations for **4CdCl**, **4ZnCl** and **8CdCl** were performed by CASTEP<sup>6</sup> on a plane-wave pseudopotential total energy package based density functional theory (DFT).<sup>7</sup> The functional developed by Perdew-Burke-Ernzerhof (PBE) functional within the generalized gradient approximation (GGA)<sup>8-9</sup> form was adopted to describe the exchange-correlation energy. The ultrasoft pseudopotentials were used to model the effective interaction between atom cores and valence electrons. H 1s<sup>1</sup>, C 2s<sup>2</sup>2p<sup>2</sup>, N 2s<sup>2</sup>2p<sup>3</sup>, O 2s<sup>2</sup>2p<sup>4</sup>, Cl 3s<sup>2</sup>3p<sup>5</sup>, Zn 4s<sup>2</sup>3d<sup>10</sup>, Cd 5s<sup>2</sup>5p<sup>2</sup>4d<sup>10</sup>, and Br 4s<sup>2</sup>4p<sup>5</sup> electrons were treated as valence electrons. Substance **4CdCl** selected a kinetic energy cutoff of 571.40 eV and a dense grid of 2 × 1 × 2 Monkhorst-Pack<sup>10</sup> k-point meshes in the Brillouin zones were chosen. **4ZnCl** selected a kinetic energy cutoff of 517 eV and a dense grid of 1 × 2 × 2 Monkhorst-Pack<sup>10</sup> k-point meshes in the Brillouin zones were chosen. Substance **8CdCl** selected a kinetic energy cutoff of 435.40 eV and a dense grid of 1 × 2 × 1 Monkhorst-Pack<sup>10</sup> k-point meshes in the Brillouin zones were chosen. The linear optical properties were examined based on the dielectric function  $\epsilon(\omega) = \epsilon_1(\omega) + i\epsilon_2(\omega)$ . The imaginary part of dielectric function  $\epsilon_2$  can be calculated based on the electronic structures and the real part is obtained by the Kramers-Kronig transformation, accordingly the refractive indices and the birefringence ( $\Delta n$ ) can be calculated. The frequency-dependent refractive indices were calculated to demonstrate the validity of birefringence measurements.

The polarizability anisotropy was defined using the static polarizability. To explore the polarizability anisotropy and electronic structure of the [C<sub>9</sub>H<sub>7</sub>NBr]<sup>+</sup> (4-bromoquinoline) and [C<sub>9</sub>H<sub>7</sub>NBr]<sup>+</sup> (8-bromoquinoline) groups, the Gaussian 09 package<sup>10</sup> was used for conducting systematic calculations, employing the hybrid B3LYP functional at the 6-31G (d, p) level. The computational results were analyzed using the Multiwfn 3.8 software.<sup>11</sup> The polarizability anisotropy was defined using the static polarizability according to the equation  $\delta = \frac{\alpha_{max} - \alpha_{min}}{\alpha_{max} + \alpha_{min}}$ , where  $\alpha$  represents the static polarizability, and  $\delta$  is the polarizability anisotropy.<sup>12-13</sup>

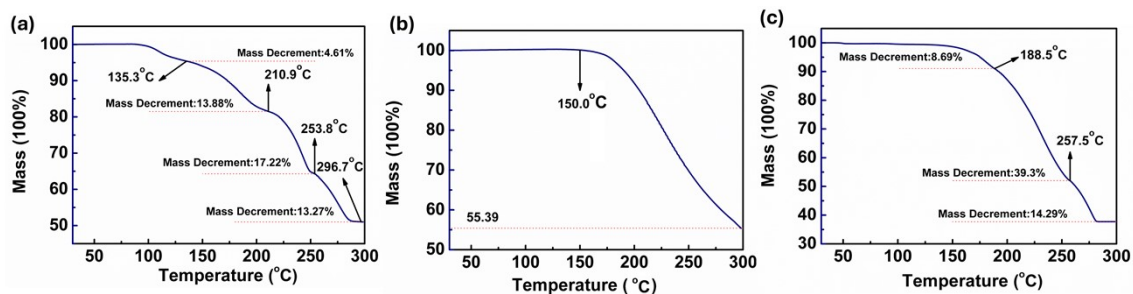

Fig. S1. Thermal stability analysis of (a) 4CdCl, (b) 4ZnCl and (c) 8CdCl.

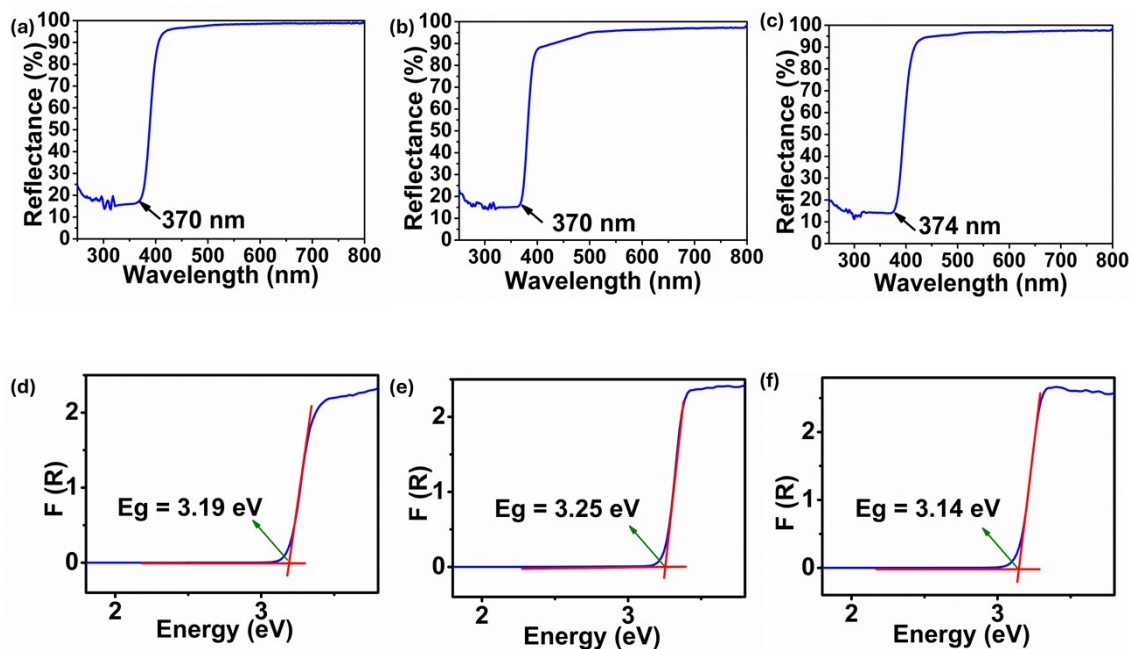

Fig. S2. The UV-vis-NIR diffuse reflectance spectrum of (a) (d) 4CdCl, (b) (e) 4ZnCl, and (c) (f) 8CdCl.

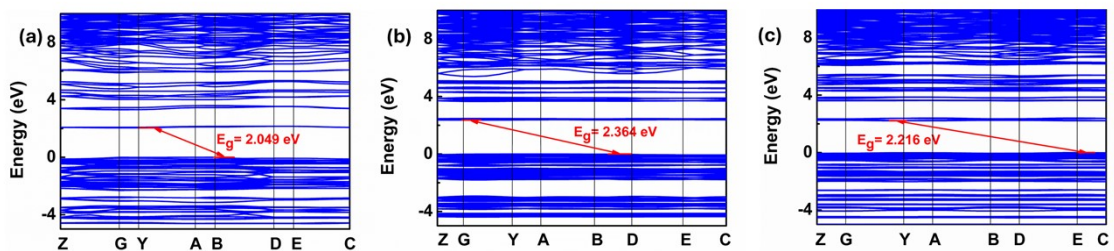

Fig. S3. Electronic band structure of (a) 4CdCl, (b) 4ZnCl, and (c) 8CdCl.

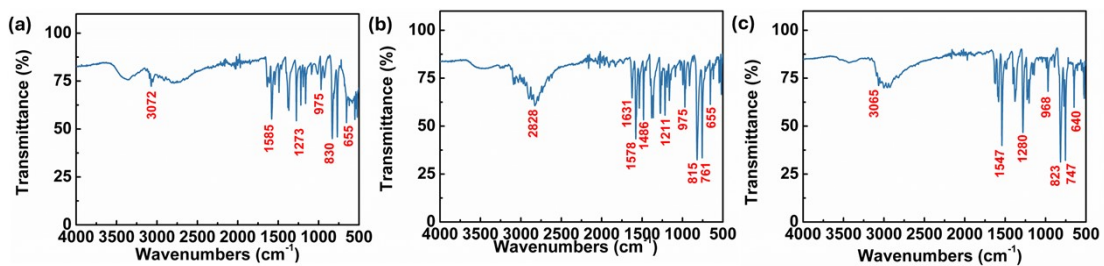

Fig. S4. Infrared spectrum of (a) 4CdCl, (b) 4ZnCl, and (c) 8CdCl.

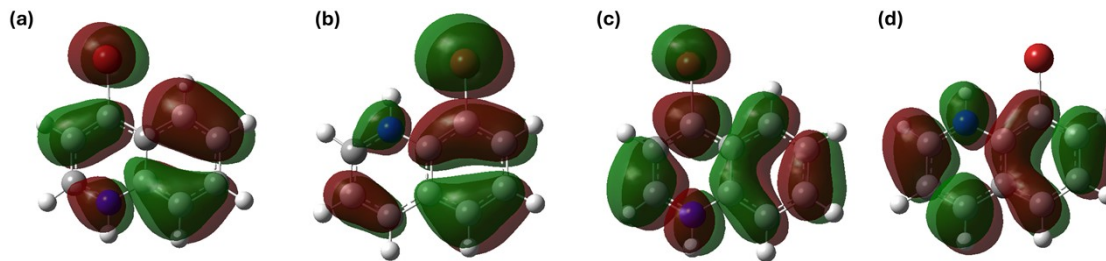

Fig. S5. The HOMO diagram of protonated (a) 4-bromoquinoline, (b) 8-bromoquinoline. The LUMO diagram of protonated (c) 4-Bromoquinoline, (d) 8-Bromoquinoline.

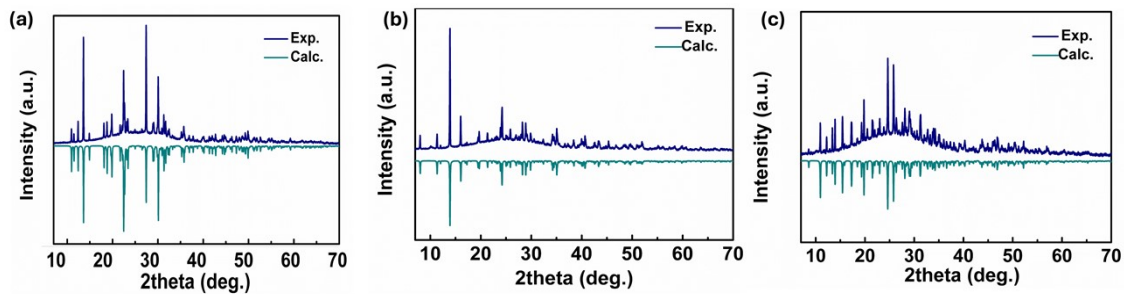

Fig. S6. Experimental XRD patterns of (a) 4CdCl, (b) 4ZnCl and (c) 8CdCl.

**Table S1. Crystal Data and Structural Refinement for 4CdCl, 4ZnCl and 8CdCl.**

| <b>4CdCl</b>                                                 |                                                                              |
|--------------------------------------------------------------|------------------------------------------------------------------------------|
| Empirical formula                                            | (C <sub>9</sub> H <sub>7</sub> NBr)CdCl <sub>3</sub> ·H <sub>2</sub> O       |
| Formula weight                                               | 445.83                                                                       |
| Temperature/K                                                | 293(2)                                                                       |
| Crystal system                                               | monoclinic                                                                   |
| Space group                                                  | <i>P</i> 2 <sub>1</sub> / <i>c</i>                                           |
| <i>a</i> /Å                                                  | 7.8674(4)                                                                    |
| <i>b</i> /Å                                                  | 22.0685(12)                                                                  |
| <i>c</i> /Å                                                  | 7.5146(4)                                                                    |
| $\alpha$ /°                                                  | 90                                                                           |
| $\beta$ /°                                                   | 98.071(5)                                                                    |
| $\gamma$ /°                                                  | 90                                                                           |
| Volume/Å <sup>3</sup>                                        | 1291.77(12)                                                                  |
| <i>Z</i>                                                     | 4                                                                            |
| $\rho_{\text{calc}}$ g/cm <sup>3</sup>                       | 2.292                                                                        |
| $\mu$ /mm <sup>-1</sup>                                      | 5.380                                                                        |
| F(000)                                                       | 848.0                                                                        |
| Crystal size/mm <sup>3</sup>                                 | 0.05 × 0.04 × 0.04                                                           |
| Radiation                                                    | Mo K $\alpha$ ( $\lambda$ = 0.71073)                                         |
| 2 $\Theta$ range for data collection/°                       | 3.692 to 54.272                                                              |
| Index ranges                                                 | -9 ≤ <i>h</i> ≤ 9, -19 ≤ <i>k</i> ≤ 27, -9 ≤ <i>l</i> ≤ 8                    |
| Reflections collected                                        | 9944                                                                         |
| Independent reflections                                      | 2665 [ <i>R</i> <sub>int</sub> = 0.0556, <i>R</i> <sub>sigma</sub> = 0.0580] |
| Data/restraints/parameters                                   | 2665/1/148                                                                   |
| Goodness-of-fit on F <sup>2</sup>                            | 1.065                                                                        |
| Final <i>R</i> indexes [ <i>I</i> ≥ 2 $\sigma$ ( <i>I</i> )] | <i>R</i> <sub>1</sub> = 0.0411, <i>wR</i> <sub>2</sub> = 0.0941              |
| Final <i>R</i> indexes [all data]                            | <i>R</i> <sub>1</sub> = 0.0555, <i>wR</i> <sub>2</sub> = 0.1021              |
| <b>4ZnCl</b>                                                 |                                                                              |
| Empirical formula                                            | (C <sub>9</sub> H <sub>7</sub> NBr) <sub>2</sub> ZnCl <sub>4</sub>           |
| Formula weight                                               | 625.338                                                                      |
| Temperature/K                                                | 298                                                                          |
| Crystal system                                               | monoclinic                                                                   |
| Space group                                                  | <i>I</i> 2/ <i>a</i>                                                         |
| <i>a</i> /Å                                                  | 17.8207(14)                                                                  |
| <i>b</i> /Å                                                  | 9.5169(5)                                                                    |
| <i>c</i> /Å                                                  | 15.2828(13)                                                                  |
| $\alpha$ /°                                                  | 90                                                                           |

|                                                |                                                               |
|------------------------------------------------|---------------------------------------------------------------|
| $\beta/^\circ$                                 | 121.725(12)                                                   |
| $\gamma/^\circ$                                | 90                                                            |
| Volume/ $\text{\AA}^3$                         | 2204.6(4)                                                     |
| Z                                              | 4                                                             |
| $\rho_{\text{calc}} \text{ g/cm}^3$            | 1.884                                                         |
| $\mu/\text{mm}^{-1}$                           | 5.230                                                         |
| F(000)                                         | 1218.6                                                        |
| Crystal size/ $\text{mm}^3$                    | $0.09 \times 0.07 \times 0.04$                                |
| Radiation                                      | Mo K $\alpha$ ( $\lambda = 0.71073$ )                         |
| 2 $\Theta$ range for data collection/ $^\circ$ | 5.06 to 54.16                                                 |
| Index ranges                                   | $-22 \leq h \leq 22, -9 \leq k \leq 12, -19 \leq l \leq 18$   |
| Reflections collected                          | 10764                                                         |
| Independent reflections                        | 2312 [ $R_{\text{int}} = 0.0273, R_{\text{sigma}} = 0.0285$ ] |
| Data/restraints/parameters                     | 2312/0/123                                                    |
| Goodness-of-fit on $F^2$                       | 1.006                                                         |
| Final R indexes [ $I \geq 2\sigma(I)$ ]        | $R_1 = 0.0324, wR_2 = 0.0755$                                 |
| Final R indexes [all data]                     | $R_1 = 0.0453, wR_2 = 0.0800$                                 |

#### 8CdCl

|                                                |                                                             |
|------------------------------------------------|-------------------------------------------------------------|
| Empirical formula                              | $(\text{C}_9\text{H}_7\text{NBr})_2\text{CdCl}_4$           |
| Formula weight                                 | 672.33                                                      |
| Temperature/K                                  | 303                                                         |
| Crystal system                                 | monoclinic                                                  |
| Space group                                    | $P2_1/n$                                                    |
| a/ $\text{\AA}$                                | 16.6604(6)                                                  |
| b/ $\text{\AA}$                                | 8.0767(3)                                                   |
| c/ $\text{\AA}$                                | 16.8133(7)                                                  |
| $\alpha/^\circ$                                | 90                                                          |
| $\beta/^\circ$                                 | 104.304(4)                                                  |
| $\gamma/^\circ$                                | 90                                                          |
| Volume/ $\text{\AA}^3$                         | 2192.28(15)                                                 |
| Z                                              | 4                                                           |
| $\rho_{\text{calc}} \text{ g/cm}^3$            | 2.037                                                       |
| $\mu/\text{mm}^{-1}$                           | 5.136                                                       |
| F(000)                                         | 1288.0                                                      |
| Crystal size/ $\text{mm}^3$                    | $0.04 \times 0.02 \times 0.03$                              |
| Radiation                                      | Mo K $\alpha$ ( $\lambda = 0.71073$ )                       |
| 2 $\Theta$ range for data collection/ $^\circ$ | 3.966 to 53.934                                             |
| Index ranges                                   | $-21 \leq h \leq 20, -7 \leq k \leq 10, -14 \leq l \leq 21$ |

|                                         |                                                                  |
|-----------------------------------------|------------------------------------------------------------------|
| Reflections collected                   | 11328                                                            |
| Independent reflections                 | 4483 [ $R_{\text{int}} = 0.0210$ , $R_{\text{sigma}} = 0.0387$ ] |
| Data/restraints/parameters              | 4483/0/244                                                       |
| Goodness-of-fit on $F^2$                | 1.050                                                            |
| Final R indexes [ $I \geq 2\sigma(I)$ ] | $R_1 = 0.0318$ , $wR_2 = 0.0542$                                 |
| Final R indexes [all data]              | $R_1 = 0.0501$ , $wR_2 = 0.0577$                                 |

**Table S2. The Fractional Atomic Coordinates ( $\times 10^4$ ) and Equivalent Isotropic Displacement Parameters ( $\text{\AA}^2 \times 10^3$ ) for 4CdCl, 4ZnCl and 8CdCl.  $U_{\text{eq}}$  is defined as 1/3 of the trace of the orthogonalised  $U_{ij}$  tensor.**

| 4CdCl |            |            |            |           |
|-------|------------|------------|------------|-----------|
| Atom  | x          | y          | z          | U(eq)     |
| Cd1   | 4558.4(5)  | 5054.1(2)  | 2447.8(4)  | 26.92(15) |
| Cl1   | 1427.4(17) | 5356.4(6)  | 2314.4(19) | 44.3(4)   |
| Cl2   | 5664.4(17) | 5773.7(5)  | 5116.7(15) | 30.3(3)   |
| Cl3   | 5600.4(19) | 5761.9(6)  | 86.3(15)   | 35.4(3)   |
| Br1   | 12022.5(7) | 1891.6(2)  | 1002.2(7)  | 37.71(18) |
| N1    | 9092(6)    | 3633.3(18) | 1918(5)    | 36.0(11)  |
| C1    | 8305(6)    | 3096(2)    | 2270(6)    | 28.5(12)  |
| C2    | 6702(7)    | 3097(3)    | 2880(6)    | 36.2(13)  |
| C3    | 6008(6)    | 2557(2)    | 3163(7)    | 33.0(13)  |
| C4    | 6761(7)    | 2014(3)    | 2900(7)    | 39.7(14)  |
| C5    | 8320(6)    | 2004(2)    | 2296(6)    | 29.9(12)  |
| C6    | 9166(6)    | 2554(2)    | 1948(6)    | 24.7(11)  |
| C7    | 10782(6)   | 2603(2)    | 1361(6)    | 25.5(11)  |
| C8    | 11480(7)   | 3150(2)    | 1049(7)    | 33.0(12)  |
| C9    | 10586(7)   | 3664(2)    | 1349(6)    | 34.2(13)  |
| O1    | 7833(5)    | 4726.9(16) | 3135(5)    | 38.3(9)   |

  

| 4ZnCl |            |           |            |           |
|-------|------------|-----------|------------|-----------|
| Atom  | x          | y         | z          | U(eq)     |
| Br1   | 6135.5(2)  | -123.3(3) | 3971.1(3)  | 54.54(14) |
| N1    | 4639.1(15) | 2978(3)   | 4821.3(18) | 47.9(6)   |
| C1    | 5387.8(19) | 2361(3)   | 5620(2)    | 43.6(7)   |
| C2    | 5651(2)    | 2674(4)   | 6636(2)    | 56.9(8)   |
| C3    | 6366(2)    | 1997(4)   | 7404(2)    | 65.7(10)  |
| C4    | 6836(2)    | 1036(4)   | 7203(3)    | 62.5(9)   |
| C5    | 6601(2)    | 732(3)    | 6219(2)    | 51.3(8)   |
| C6    | 5855.0(17) | 1396(3)   | 5385(2)    | 38.8(6)   |
| C7    | 5531.8(18) | 1144(3)   | 4332(2)    | 41.5(7)   |

| Atom | <i>x</i>   | <i>y</i>  | <i>z</i>  | U(eq)     |
|------|------------|-----------|-----------|-----------|
| C8   | 4782.2(18) | 1773(3)   | 3573(2)   | 44.2(7)   |
| C9   | 4341(2)    | 2700(4)   | 3846(2)   | 51.1(8)   |
| Zn1  | 7500       | 6098.9(4) | 5000      | 35.15(14) |
| Cl1  | 6289.5(6)  | 4757.8(9) | 4545.3(8) | 68.3(3)   |
| Cl2  | 7707.4(5)  | 7409.1(7) | 6337.5(5) | 45.0(2)   |

**8CdCl**

| Atom | <i>x</i>   | <i>y</i>   | <i>z</i>   | U(eq)     |
|------|------------|------------|------------|-----------|
| Cd1  | 4996.8(2)  | 6607.3(3)  | 2877.2(2)  | 35.26(8)  |
| Cl1  | 5324.7(5)  | 7166.9(10) | 4370.9(5)  | 46.0(2)   |
| Cl2  | 3956.3(5)  | 4333.9(9)  | 2685.6(5)  | 42.1(2)   |
| Cl3  | 4370.4(5)  | 8917.4(10) | 2009.2(5)  | 48.8(2)   |
| Cl4  | 6274.6(5)  | 5778.3(11) | 2509.2(5)  | 52.1(2)   |
| Br1  | -9.3(2)    | 8527.0(4)  | 4007.0(2)  | 45.52(11) |
| N1   | 1676.2(13) | 7012(3)    | 3873.6(14) | 30.4(6)   |
| C1   | 2348.4(19) | 6441(4)    | 3678(2)    | 40.6(8)   |
| C2   | 2912.1(19) | 5500(4)    | 4217(2)    | 44.0(9)   |
| C3   | 2769.6(18) | 5136(4)    | 4965(2)    | 43.3(9)   |
| C4   | 2046.5(17) | 5699(3)    | 5176.2(19) | 32.6(7)   |
| C5   | 1862.5(19) | 5321(4)    | 5926(2)    | 44.1(9)   |
| C6   | 1153(2)    | 5874(4)    | 6092(2)    | 49.9(9)   |
| C7   | 593.9(19)  | 6834(4)    | 5513(2)    | 45.1(9)   |
| C8   | 751.3(17)  | 7238(4)    | 4786.2(18) | 33.7(7)   |
| C9   | 1483.6(16) | 6660(3)    | 4599.1(17) | 26.4(7)   |
| Br2  | 3507.7(2)  | 10042.6(4) | 3522.5(2)  | 46.95(11) |
| N2   | 4054.2(13) | 8679(3)    | 5293.5(15) | 33.9(6)   |
| C10  | 4414(2)    | 8001(4)    | 6016(2)    | 43.9(9)   |
| C11  | 4062(2)    | 8170(4)    | 6667(2)    | 56.6(10)  |
| C12  | 3326(2)    | 9007(4)    | 6562(2)    | 54.2(9)   |
| C13  | 2947.9(19) | 9739(4)    | 5805(2)    | 37.9(8)   |
| C14  | 2193(2)    | 10616(4)   | 5673(2)    | 51.2(9)   |
| C15  | 1866(2)    | 11298(4)   | 4925(3)    | 52.6(10)  |
| C16  | 2255.4(18) | 11149(4)   | 4275(2)    | 41.9(8)   |
| C17  | 2983.1(17) | 10292(3)   | 4394.0(18) | 32.6(7)   |
| C18  | 3335.8(17) | 9571(3)    | 5154.9(19) | 30.0(7)   |

**Table S3. Anisotropic Displacement Parameters ( $\text{\AA}^2 \times 10^3$ ) for 4CdCl, 4ZnCl and 8CdCl. The Anisotropic displacement factor exponent takes the form:  $-2\pi^2[h^2a^{*2}U_{11}+2hka^*b^*U_{12}+\dots]$ .**

| 4CdCl |          |          |          |           |          |           |
|-------|----------|----------|----------|-----------|----------|-----------|
| Atom  | $U_{11}$ | $U_{22}$ | $U_{33}$ | $U_{23}$  | $U_{13}$ | $U_{12}$  |
| Cd1   | 36.2(3)  | 24.0(3)  | 22.3(2)  | -0.08(14) | 9.92(16) | -1.29(16) |
| Cl1   | 32.2(8)  | 39.6(9)  | 60.4(9)  | 4.0(7)    | 4.6(6)   | 0.4(6)    |
| Cl2   | 43.5(8)  | 20.6(7)  | 28.2(6)  | -0.4(5)   | 9.7(5)   | -5.4(6)   |
| Cl3   | 56.3(9)  | 23.0(7)  | 30.0(7)  | -2.9(5)   | 16.5(6)  | -9.0(6)   |
| Br1   | 33.9(3)  | 35.3(4)  | 43.9(3)  | -5.4(2)   | 5.1(2)   | 10.9(2)   |
| N1    | 43(3)    | 23(2)    | 41(3)    | 0(2)      | 2(2)     | 10(2)     |
| C1    | 30(3)    | 27(3)    | 29(3)    | -1(2)     | 4(2)     | 4(2)      |
| C2    | 33(3)    | 47(4)    | 30(3)    | -6(2)     | 6(2)     | 9(3)      |
| C3    | 19(3)    | 51(4)    | 28(3)    | -2(3)     | 2(2)     | -4(3)     |
| C4    | 43(3)    | 49(4)    | 27(3)    | 7(3)      | 6(2)     | -18(3)    |
| C5    | 33(3)    | 24(3)    | 32(3)    | 0(2)      | 0(2)     | -6(2)     |
| C6    | 29(3)    | 23(3)    | 21(2)    | -0.2(19)  | 1(2)     | 1(2)      |
| C7    | 27(3)    | 28(3)    | 22(3)    | -4(2)     | 3(2)     | 2(2)      |
| C8    | 30(3)    | 29(3)    | 41(3)    | -3(2)     | 8(2)     | -4(2)     |
| C9    | 39(3)    | 26(3)    | 39(3)    | 3(2)      | 9(3)     | -7(2)     |
| O1    | 38(2)    | 34(2)    | 45(2)    | -2.7(18)  | 13.1(18) | -4.2(18)  |

  

| 4ZnCl |          |          |          |          |           |           |
|-------|----------|----------|----------|----------|-----------|-----------|
| Atom  | $U_{11}$ | $U_{22}$ | $U_{33}$ | $U_{23}$ | $U_{13}$  | $U_{12}$  |
| Br1   | 54.1(2)  | 53.6(2)  | 63.6(2)  | 5.40(14) | 36.20(19) | -1.60(15) |
| N1    | 34.3(13) | 65.8(17) | 50.6(15) | 3.2(12)  | 27.2(12)  | -3.0(13)  |
| C1    | 37.3(16) | 52.4(18) | 45.1(16) | -7.8(13) | 24.3(14)  | 1.7(14)   |
| C2    | 56(2)    | 69(2)    | 52.9(19) | -8.8(17) | 33.7(17)  | -3.3(17)  |
| C3    | 71(2)    | 83(3)    | 40.7(18) | -17(2)   | 27.3(18)  | 1.5(18)   |
| C4    | 62(2)    | 60(2)    | 49(2)    | -5.6(18) | 17.4(17)  | 13.9(16)  |
| C5    | 47.4(18) | 44.4(18) | 55.2(19) | -0.5(15) | 22.3(16)  | 6.4(14)   |
| C6    | 35.3(15) | 37.5(15) | 44.9(16) | -8.8(12) | 22.0(13)  | 2.4(12)   |
| C7    | 37.8(16) | 44.0(16) | 52.0(17) | -5.6(13) | 30.0(14)  | -1.3(13)  |
| C8    | 34.3(15) | 57.7(18) | 39.7(15) | 1.1(14)  | 18.9(13)  | 1.5(14)   |
| C9    | 32.8(16) | 71(2)    | 46.4(17) | 4.6(15)  | 19.1(13)  | 4.4(16)   |
| Zn1   | 31.6(2)  | 37.4(3)  | 41.3(3)  | -0       | 22.4(2)   | 0         |
| Cl1   | 62.0(6)  | 61.8(5)  | 107.9(8) | -28.8(4) | 63.2(6)   | -36.1(5)  |
| Cl2   | 49.8(4)  | 50.6(4)  | 32.1(3)  | -0.6(3)  | 19.8(3)   | -1.2(3)   |

| 8CdCl |                 |                 |                 |                 |                 |                 |
|-------|-----------------|-----------------|-----------------|-----------------|-----------------|-----------------|
| Atom  | U <sub>11</sub> | U <sub>22</sub> | U <sub>33</sub> | U <sub>23</sub> | U <sub>13</sub> | U <sub>12</sub> |
| Cd1   | 31.90(13)       | 37.40(15)       | 36.06(15)       | 3.48(11)        | 7.58(10)        | 3.16(10)        |
| Cl1   | 38.7(4)         | 58.5(5)         | 38.2(5)         | -6.4(4)         | 4.7(4)          | 10.1(4)         |
| Cl2   | 43.2(5)         | 45.9(5)         | 38.4(5)         | -4.2(4)         | 12.3(4)         | -8.7(4)         |
| Cl3   | 52.2(5)         | 47.8(5)         | 48.7(6)         | 16.6(4)         | 16.7(4)         | 15.3(4)         |
| Cl4   | 34.9(4)         | 70.1(6)         | 53.3(6)         | 3.9(5)          | 14.7(4)         | 9.9(4)          |
| Br1   | 34.73(18)       | 60.6(2)         | 41.6(2)         | 8.48(17)        | 10.05(15)       | 14.48(15)       |
| N1    | 28.5(13)        | 31.0(14)        | 32.1(15)        | -5.0(12)        | 8.1(11)         | -2.5(11)        |
| C1    | 40.6(19)        | 42(2)           | 44(2)           | -14.2(17)       | 20.6(17)        | -9.4(16)        |
| C2    | 34.7(18)        | 40(2)           | 65(3)           | -11.8(19)       | 26.1(18)        | 4.0(15)         |
| C3    | 34.2(18)        | 36(2)           | 56(2)           | -5.3(17)        | 2.8(17)         | 2.6(15)         |
| C4    | 29.1(16)        | 31.7(18)        | 36(2)           | -4.2(15)        | 5.8(15)         | 3.2(14)         |
| C5    | 43(2)           | 46(2)           | 40(2)           | 9.0(17)         | 2.6(17)         | 8.6(16)         |
| C6    | 60(2)           | 60(2)           | 33(2)           | 11.3(18)        | 17.3(18)        | 13.8(19)        |
| C7    | 42.8(19)        | 57(2)           | 40(2)           | 2.7(18)         | 18.2(17)        | 10.8(16)        |
| C8    | 30.6(16)        | 39.0(18)        | 30.6(19)        | -0.6(15)        | 5.6(14)         | 3.7(14)         |
| C9    | 28.0(15)        | 25.8(16)        | 26.2(17)        | -4.7(14)        | 8.4(13)         | -4.2(13)        |
| Br2   | 41.48(19)       | 59.5(2)         | 40.0(2)         | 13.43(17)       | 10.38(16)       | 0.56(16)        |
| N2    | 31.7(14)        | 39.0(16)        | 31.1(16)        | 0.9(12)         | 8.0(12)         | -1.2(12)        |
| C10   | 38.3(19)        | 40(2)           | 48(2)           | 8.0(17)         | 0.0(18)         | -2.8(15)        |
| C11   | 72(3)           | 61(3)           | 31(2)           | 13.1(18)        | 2(2)            | -3(2)           |
| C12   | 63(2)           | 63(2)           | 42(2)           | -2(2)           | 23.2(19)        | -6(2)           |
| C13   | 37.4(18)        | 38.9(19)        | 39(2)           | -5.8(16)        | 12.2(16)        | -3.9(15)        |
| C14   | 45(2)           | 55(2)           | 61(3)           | -12(2)          | 26.1(19)        | 1.8(18)         |
| C15   | 33.5(19)        | 47(2)           | 77(3)           | -11(2)          | 12(2)           | 8.1(16)         |
| C16   | 33.4(18)        | 36.7(19)        | 47(2)           | -1.1(16)        | -5.3(16)        | 1.9(15)         |
| C17   | 26.9(16)        | 31.4(17)        | 38(2)           | -0.8(15)        | 4.7(14)         | -4.6(13)        |
| C18   | 24.4(15)        | 27.1(17)        | 37(2)           | -0.3(15)        | 4.6(14)         | -5.2(13)        |

Table S4. Bond Lengths for 4CdCl, 4ZnCl and 8CdCl.

| 4CdCl              |                  |            |                    |    |          |
|--------------------|------------------|------------|--------------------|----|----------|
| Atom Atom Length/Å |                  |            | Atom Atom Length/Å |    |          |
| Cd1                | Cl1              | 2.5403(14) | C1                 | C6 | 1.411(6) |
| Cd1                | Cl2              | 2.6098(12) | C2                 | C3 | 1.338(7) |
| Cd1                | Cl2 <sup>1</sup> | 2.6091(12) | C3                 | C4 | 1.365(7) |
| Cd1                | Cl3              | 2.5826(13) | C4                 | C5 | 1.366(7) |
| Cd1                | Cl3 <sup>2</sup> | 2.6112(12) | C5                 | C6 | 1.427(6) |
| Br1                | C7               | 1.888(5)   | C6                 | C7 | 1.407(7) |

| Atom Atom Length/Å |    |          | Atom Atom Length/Å |    |          |
|--------------------|----|----------|--------------------|----|----------|
| N1                 | C1 | 1.380(6) | C7                 | C8 | 1.360(6) |
| N1                 | C9 | 1.308(6) | C8                 | C9 | 1.370(7) |
| C1                 | C2 | 1.401(7) |                    |    |          |

<sup>1</sup>1-X,1-Y,1-Z; <sup>2</sup>1-X,1-Y,-Z

#### 4ZnCl

| Atom Atom Length/Å |    |          | Atom Atom Length/Å |                  |           |
|--------------------|----|----------|--------------------|------------------|-----------|
| Br1                | C7 | 1.882(3) | C5                 | C6               | 1.417(4)  |
| N1                 | C1 | 1.379(4) | C6                 | C7               | 1.416(4)  |
| N1                 | C9 | 1.319(4) | C7                 | C8               | 1.363(4)  |
| C1                 | C2 | 1.398(4) | C8                 | C9               | 1.386(4)  |
| C1                 | C6 | 1.407(4) | Zn1                | Cl1 <sup>1</sup> | 2.2779(8) |
| C2                 | C3 | 1.358(5) | Zn1                | Cl1              | 2.2779(8) |
| C3                 | C4 | 1.380(5) | Zn1                | Cl2 <sup>1</sup> | 2.2528(7) |
| C4                 | C5 | 1.362(5) | Zn1                | Cl2              | 2.2528(7) |

<sup>1</sup>3/2-X,+Y,1-Z

#### 8CdCl

| Atom Atom Length/Å |     |           | Atom Atom Length/Å |     |          |
|--------------------|-----|-----------|--------------------|-----|----------|
| Cd1                | Cl1 | 2.4763(8) | C7                 | C8  | 1.352(4) |
| Cd1                | Cl2 | 2.4908(8) | C8                 | C9  | 1.412(4) |
| Cd1                | Cl3 | 2.4388(8) | Br2                | C17 | 1.893(3) |
| Cd1                | Cl4 | 2.4524(8) | N2                 | C10 | 1.332(4) |
| Br1                | C8  | 1.894(3)  | N2                 | C18 | 1.367(3) |
| N1                 | C1  | 1.326(3)  | C10                | C11 | 1.370(5) |
| N1                 | C9  | 1.366(3)  | C11                | C12 | 1.373(5) |
| C1                 | C2  | 1.364(4)  | C12                | C13 | 1.403(4) |
| C2                 | C3  | 1.368(4)  | C13                | C14 | 1.412(4) |
| C3                 | C4  | 1.413(4)  | C13                | C18 | 1.408(4) |
| C4                 | C5  | 1.402(4)  | C14                | C15 | 1.358(4) |
| C4                 | C9  | 1.405(4)  | C15                | C16 | 1.405(5) |
| C5                 | C6  | 1.356(4)  | C16                | C17 | 1.367(4) |
| C6                 | C7  | 1.402(4)  | C17                | C18 | 1.396(4) |

**Table S5. Bond Angles for 4CdCl, 4ZnCl and 8CdCl.**

| 4CdCl                  |     |                  |                        |    |       |          |
|------------------------|-----|------------------|------------------------|----|-------|----------|
| Atom Atom Atom Angle/° |     |                  | Atom Atom Atom Angle/° |    |       |          |
| Cl1                    | Cd1 | Cl2 <sup>1</sup> | 92.94(4)               | N1 | C1 C6 | 117.1(5) |

| Atom Atom Atom Angle/° |     |                  |           | Atom Atom Atom Angle/° |    |     |          |
|------------------------|-----|------------------|-----------|------------------------|----|-----|----------|
| C11                    | Cd1 | Cl2              | 95.01(5)  | C2                     | C1 | C6  | 122.2(5) |
| C11                    | Cd1 | Cl3 <sup>2</sup> | 101.86(5) | C3                     | C2 | C1  | 117.2(5) |
| C11                    | Cd1 | Cl3              | 102.34(5) | C2                     | C3 | C4  | 124.3(5) |
| Cl2 <sup>1</sup>       | Cd1 | Cl2              | 86.27(4)  | C3                     | C4 | C5  | 119.3(5) |
| Cl2 <sup>1</sup>       | Cd1 | Cl3 <sup>2</sup> | 91.58(4)  | C4                     | C5 | C6  | 120.7(5) |
| Cl2                    | Cd1 | Cl3 <sup>2</sup> | 163.08(5) | C1                     | C6 | C5  | 116.2(5) |
| Cl3                    | Cd1 | Cl2              | 93.22(4)  | C7                     | C6 | C1  | 117.7(4) |
| Cl3                    | Cd1 | Cl2 <sup>1</sup> | 164.70(5) | C7                     | C6 | C5  | 126.0(4) |
| Cl3                    | Cd1 | Cl3 <sup>2</sup> | 84.46(4)  | C6                     | C7 | Br1 | 119.3(4) |
| Cd1 <sup>1</sup>       | Cl2 | Cd1              | 93.73(4)  | C8                     | C7 | Br1 | 119.0(4) |
| Cd1                    | Cl3 | Cd1 <sup>2</sup> | 95.55(4)  | C8                     | C7 | C6  | 121.8(5) |
| C9                     | N1  | C1               | 123.7(4)  | C7                     | C8 | C9  | 118.5(5) |
| N1                     | C1  | C2               | 120.7(5)  | N1                     | C9 | C8  | 121.1(5) |

<sup>1</sup>1-X,1-Y,1-Z; <sup>2</sup>1-X,1-Y,-Z

#### 4ZnCl

| Atom Atom Atom Angle/° |    |    |          | Atom Atom Atom Angle/° |     |                  |           |
|------------------------|----|----|----------|------------------------|-----|------------------|-----------|
| C9                     | N1 | C1 | 122.8(3) | C6                     | C7  | Br1              | 119.2(2)  |
| C2                     | C1 | N1 | 119.7(3) | C8                     | C7  | Br1              | 119.1(2)  |
| C6                     | C1 | N1 | 118.7(2) | C8                     | C7  | C6               | 121.6(3)  |
| C6                     | C1 | C2 | 121.6(3) | C9                     | C8  | C7               | 118.7(3)  |
| C3                     | C2 | C1 | 118.3(3) | C8                     | C9  | N1               | 120.8(3)  |
| C4                     | C3 | C2 | 121.7(3) | Cl1 <sup>1</sup>       | Zn1 | Cl1              | 111.85(5) |
| C5                     | C4 | C3 | 121.1(3) | Cl2                    | Zn1 | Cl1 <sup>1</sup> | 110.86(3) |
| C6                     | C5 | C4 | 119.8(3) | Cl2 <sup>1</sup>       | Zn1 | Cl1              | 110.86(3) |
| C5                     | C6 | C1 | 117.6(3) | Cl2                    | Zn1 | Cl1              | 105.32(3) |
| C7                     | C6 | C1 | 117.3(3) | Cl2 <sup>1</sup>       | Zn1 | Cl1 <sup>1</sup> | 105.32(3) |
| C7                     | C6 | C5 | 125.1(3) | Cl2                    | Zn1 | Cl2 <sup>1</sup> | 112.78(4) |

<sup>3</sup>2-X,+Y,1-Z

#### 8CdCl

| Atom Atom Atom Angle/° |     |     |           | Atom Atom Atom Angle/° |     |     |          |
|------------------------|-----|-----|-----------|------------------------|-----|-----|----------|
| Cl1                    | Cd1 | Cl2 | 103.76(3) | N1                     | C9  | C4  | 117.9(3) |
| Cl3                    | Cd1 | Cl1 | 114.95(3) | N1                     | C9  | C8  | 122.4(3) |
| Cl3                    | Cd1 | Cl2 | 107.78(3) | C4                     | C9  | C8  | 119.7(3) |
| Cl3                    | Cd1 | Cl4 | 109.13(3) | C10                    | N2  | C18 | 123.3(3) |
| Cl4                    | Cd1 | Cl1 | 108.54(3) | N2                     | C10 | C11 | 120.2(3) |
| Cl4                    | Cd1 | Cl2 | 112.70(3) | C10                    | C11 | C12 | 119.4(3) |

| Atom | Atom | Atom | Angle/°  | Atom | Atom | Atom | Angle/°  |
|------|------|------|----------|------|------|------|----------|
| C1   | N1   | C9   | 123.3(3) | C11  | C12  | C13  | 120.8(3) |
| N1   | C1   | C2   | 120.9(3) | C12  | C13  | C14  | 122.5(3) |
| C1   | C2   | C3   | 118.9(3) | C12  | C13  | C18  | 118.3(3) |
| C2   | C3   | C4   | 121.0(3) | C18  | C13  | C14  | 119.2(3) |
| C5   | C4   | C3   | 123.0(3) | C15  | C14  | C13  | 119.1(3) |
| C5   | C4   | C9   | 119.0(3) | C14  | C15  | C16  | 121.9(3) |
| C9   | C4   | C3   | 118.0(3) | C17  | C16  | C15  | 119.5(3) |
| C6   | C5   | C4   | 120.5(3) | C16  | C17  | Br2  | 120.2(2) |
| C5   | C6   | C7   | 120.2(3) | C16  | C17  | C18  | 120.1(3) |
| C8   | C7   | C6   | 121.1(3) | C18  | C17  | Br2  | 119.6(2) |
| C7   | C8   | Br1  | 120.8(2) | N2   | C18  | C13  | 118.0(3) |
| C7   | C8   | C9   | 119.5(3) | N2   | C18  | C17  | 121.9(3) |
| C9   | C8   | Br1  | 119.7(2) | C17  | C18  | C13  | 120.1(3) |

**Table S6. Torsion Angles for 4CdCl, 4ZnCl and 8CdCl.**

| 4CdCl |    |    |     |           |    |    |    |     |          |
|-------|----|----|-----|-----------|----|----|----|-----|----------|
| A     | B  | C  | D   | Angle/°   | A  | B  | C  | D   | Angle/°  |
| Br1   | C7 | C8 | C9  | -178.7(4) | C3 | C4 | C5 | C6  | 0.3(7)   |
| N1    | C1 | C2 | C3  | 179.0(4)  | C4 | C5 | C6 | C1  | 0.3(7)   |
| N1    | C1 | C6 | C5  | -179.2(4) | C4 | C5 | C6 | C7  | 178.6(5) |
| N1    | C1 | C6 | C7  | 2.3(6)    | C5 | C6 | C7 | Br1 | -0.8(6)  |
| C1    | N1 | C9 | C8  | 0.4(7)    | C5 | C6 | C7 | C8  | 179.4(4) |
| C1    | C2 | C3 | C4  | 0.1(8)    | C6 | C1 | C2 | C3  | 0.5(7)   |
| C1    | C6 | C7 | Br1 | 177.6(3)  | C6 | C7 | C8 | C9  | 1.1(7)   |
| C1    | C6 | C7 | C8  | -2.2(7)   | C7 | C8 | C9 | N1  | -0.1(7)  |
| C2    | C1 | C6 | C5  | -0.6(7)   | C9 | N1 | C1 | C2  | 180.0(5) |
| C2    | C1 | C6 | C7  | -179.1(4) | C9 | N1 | C1 | C6  | -1.5(7)  |
| C2    | C3 | C4 | C5  | -0.5(8)   |    |    |    |     |          |

  

| 4ZnCl |    |    |    |           |    |    |    |    |           |
|-------|----|----|----|-----------|----|----|----|----|-----------|
| A     | B  | C  | D  | Angle/°   | A  | B  | C  | D  | Angle/°   |
| Br1   | C7 | C6 | C1 | 179.4(2)  | C1 | C6 | C5 | C4 | 0.4(3)    |
| Br1   | C7 | C6 | C5 | -1.8(3)   | C1 | C6 | C7 | C8 | -2.2(3)   |
| Br1   | C7 | C8 | C9 | 179.8(2)  | C2 | C3 | C4 | C5 | 0.2(4)    |
| N1    | C1 | C2 | C3 | 176.8(3)  | C3 | C4 | C5 | C6 | -0.9(4)   |
| N1    | C1 | C6 | C5 | -177.4(3) | C4 | C5 | C6 | C7 | -178.4(3) |
| N1    | C1 | C6 | C7 | 1.4(3)    | C5 | C6 | C7 | C8 | 176.6(3)  |
| N1    | C9 | C8 | C7 | 0.3(4)    | C6 | C7 | C8 | C9 | 1.3(3)    |

| A  | B  | C  | D  | Angle/° | A | B | C | D | Angle/° |
|----|----|----|----|---------|---|---|---|---|---------|
| C1 | C2 | C3 | C4 | 0.9(4)  |   |   |   |   |         |

**8CdCl**

| A   | B  | C  | D   | Angle/°   | A   | B   | C   | D   | Angle/°   |
|-----|----|----|-----|-----------|-----|-----|-----|-----|-----------|
| Br1 | C8 | C9 | N1  | 0.9(4)    | Br2 | C17 | C18 | N2  | -0.1(4)   |
| Br1 | C8 | C9 | C4  | -179.8(2) | Br2 | C17 | C18 | C13 | -179.6(2) |
| N1  | C1 | C2 | C3  | 0.6(5)    | N2  | C10 | C11 | C12 | 1.6(5)    |
| C1  | N1 | C9 | C4  | 2.7(4)    | C10 | N2  | C18 | C13 | -1.8(4)   |
| C1  | N1 | C9 | C8  | -178.0(3) | C10 | N2  | C18 | C17 | 178.8(3)  |
| C1  | C2 | C3 | C4  | 0.9(5)    | C10 | C11 | C12 | C13 | -2.3(5)   |
| C2  | C3 | C4 | C5  | 178.2(3)  | C11 | C12 | C13 | C14 | -179.7(3) |
| C2  | C3 | C4 | C9  | -0.7(4)   | C11 | C12 | C13 | C18 | 1.0(5)    |
| C3  | C4 | C5 | C6  | -179.0(3) | C12 | C13 | C14 | C15 | 179.7(3)  |
| C3  | C4 | C9 | N1  | -1.0(4)   | C12 | C13 | C18 | N2  | 1.0(4)    |
| C3  | C4 | C9 | C8  | 179.6(3)  | C12 | C13 | C18 | C17 | -179.5(3) |
| C4  | C5 | C6 | C7  | 0.0(5)    | C13 | C14 | C15 | C16 | 0.4(5)    |
| C5  | C4 | C9 | N1  | -180.0(3) | C14 | C13 | C18 | N2  | -178.3(3) |
| C5  | C4 | C9 | C8  | 0.7(4)    | C14 | C13 | C18 | C17 | 1.2(4)    |
| C5  | C6 | C7 | C8  | -0.5(5)   | C14 | C15 | C16 | C17 | 0.1(5)    |
| C6  | C7 | C8 | Br1 | 179.7(2)  | C15 | C16 | C17 | Br2 | 178.9(2)  |
| C6  | C7 | C8 | C9  | 1.1(5)    | C15 | C16 | C17 | C18 | 0.0(4)    |
| C7  | C8 | C9 | N1  | 179.5(3)  | C16 | C17 | C18 | N2  | 178.8(3)  |
| C7  | C8 | C9 | C4  | -1.2(4)   | C16 | C17 | C18 | C13 | -0.7(4)   |
| C9  | N1 | C1 | C2  | -2.5(4)   | C18 | N2  | C10 | C11 | 0.4(4)    |
| C9  | C4 | C5 | C6  | -0.1(5)   | C18 | C13 | C14 | C15 | -1.0(5)   |

**Table S7. Hydrogen Atom Coordinates ( $\text{\AA} \times 10^4$ ) and Isotropic Displacement Parameters ( $\text{\AA}^2 \times 10^3$ ) for 4CdCl, 4ZnCl and 8CdCl.**

**4CdCl**

| Atom | x        | y       | z       | U(eq) |
|------|----------|---------|---------|-------|
| H1   | 8570.21  | 3966.74 | 2083.19 | 43    |
| H2   | 6142.63  | 3456.39 | 3078.33 | 43    |
| H3   | 4943.59  | 2552.98 | 3566.49 | 40    |
| H4   | 6218.78  | 1653.35 | 3129.94 | 48    |
| H5   | 8835.91  | 1634.43 | 2110.21 | 36    |
| H8   | 12541.08 | 3174.76 | 642.07  | 40    |
| H9   | 11049.15 | 4041.55 | 1143.63 | 41    |
| H1A  | 8556.06  | 4971.9  | 2794.73 | 57    |

| Atom | x       | y       | z       | U(eq) |
|------|---------|---------|---------|-------|
| H1B  | 8048.98 | 4730.24 | 4275.63 | 57    |

**4ZnCl**

| Atom | x          | y       | z          | U(eq)    |
|------|------------|---------|------------|----------|
| H1   | 4354.6(15) | 3569(3) | 4965.4(18) | 57.4(7)  |
| H2   | 5345(2)    | 3330(4) | 6782(2)    | 68.2(10) |
| H3   | 6544(2)    | 2186(4) | 8084(2)    | 78.9(12) |
| H4   | 7321(2)    | 588(4)  | 7747(3)    | 75.0(11) |
| H5   | 6929(2)    | 92(3)   | 6095(2)    | 61.5(9)  |
| H8   | 4571.3(18) | 1582(3) | 2885(2)    | 53.0(8)  |
| H9   | 3827(2)    | 3133(4) | 3336(2)    | 61.3(9)  |

**8CdCl**

| Atom | x       | y        | z       | U(eq) |
|------|---------|----------|---------|-------|
| H1   | 1344.79 | 7635.1   | 3526.39 | 37    |
| H1A  | 2436.91 | 6685.88  | 3165.72 | 49    |
| H2   | 3385.35 | 5111.78  | 4078.18 | 53    |
| H3   | 3154.32 | 4509.2   | 5339.42 | 52    |
| H5   | 2230.22 | 4684.6   | 6312.34 | 53    |
| H6   | 1036.31 | 5616.98  | 6590.62 | 60    |
| H7   | 106.91  | 7199.59  | 5631.56 | 54    |
| H2A  | 4285.81 | 8548.29  | 4893.86 | 41    |
| H10  | 4904.98 | 7412.13  | 6078.35 | 53    |
| H11  | 4319.8  | 7721.71  | 7175.48 | 68    |
| H12  | 3075.2  | 9089.55  | 6996.61 | 65    |
| H14  | 1923.26 | 10725.22 | 6092.63 | 61    |
| H15  | 1371.02 | 11880.76 | 4839.15 | 63    |
| H16  | 2019.63 | 11629.61 | 3768.89 | 50    |

**Table S8. Birefringence Comparisons of Organic-Inorganic Hybrid Materials**

| Number | substance                                                                                                                                                           | Birefringence | Reference |
|--------|---------------------------------------------------------------------------------------------------------------------------------------------------------------------|---------------|-----------|
| 1      | (CHNO)(CHNO)ZnCl                                                                                                                                                    | 0.048         | 14        |
| 2      | Na(C <sub>2</sub> H <sub>10</sub> N <sub>2</sub> ) <sub>2</sub> [Zn <sub>3</sub> (PO <sub>4</sub> ) <sub>2</sub> (H <sub>0.5</sub> PO <sub>4</sub> ) <sub>2</sub> ] | 0.060@546 nm  | 15        |
| 3      | KPb <sub>3</sub> (3-C <sub>5</sub> H <sub>4</sub> NCOO) <sub>2</sub> Cl <sub>3</sub> Br <sub>2</sub>                                                                | 0.13@1064 nm  | 16        |
| 4      | (CHNO)ZnCl (II)                                                                                                                                                     | 0.063         | 14        |
| 5      | (C <sub>2</sub> H <sub>10</sub> N <sub>2</sub> )[Zn <sub>2</sub> (HPO <sub>4</sub> ) <sub>2</sub> Cl <sub>2</sub> ]                                                 | 0.066@546 nm  | 17        |
| 6      | (CHNO)ZnBr (III)]                                                                                                                                                   | 0.071         | 16        |
| 7      | (C <sub>3</sub> N <sub>6</sub> H <sub>7</sub> ) <sub>3</sub> HgCl <sub>5</sub>                                                                                      | 0.093@1064 nm | 18        |

|    |                                                                                                                               |                 |                  |
|----|-------------------------------------------------------------------------------------------------------------------------------|-----------------|------------------|
| 8  | $\text{Ba}_3(\text{C}_4\text{H}_4\text{O}_5)_2(\text{OH})_2$                                                                  | 0.1@546 nm      | 19               |
| 9  | $(\text{C}_8\text{H}_7\text{N}_2\text{O}_2)_2[\text{Bi}_2\text{Br}_8] \cdot 2\text{H}_2\text{O}$                              | 0.1@550 nm      | 20               |
| 10 | $\text{KPb}_3(3\text{-C}_5\text{H}_4\text{NCOO})_2\text{Br}_5$                                                                | 0.109@546 nm    | 16               |
| 11 | $(3\text{-C}_6\text{H}_{10}\text{N}_2)\text{ZnCl}_4$                                                                          | 0.129@546 nm    | 21               |
| 12 | $\text{C}_{10}\text{H}_6\text{NO}_2\text{Cd}(\text{NO}_3) \cdot 2\text{H}_2\text{O}$                                          | 0.137@550 nm    | 22               |
| 13 | $(3\text{-C}_6\text{H}_{10}\text{N}_2)\text{ZnBr}_4$                                                                          | 0.144 @ 546 nm  | 21               |
| 14 | $(\text{C}_6\text{H}_{10}\text{N}_2)\text{CdBr}_4 \cdot \text{H}_2\text{O}$                                                   | 0.158@546 nm    | 23               |
| 15 | $\text{Mg}(\text{C}_3\text{O}_4\text{H}_2)(\text{H}_2\text{O})_2$                                                             | 0.164@546.1 nm  | 24               |
| 16 | $(\text{C}_7\text{H}_8\text{N}_2\text{S})_4\text{CdCl}_2$                                                                     | 0.17@546 nm     | 25               |
| 17 | $(\text{C}_{12}\text{H}_9\text{N}_2)_2\text{TeBr}_6 \cdot 2\text{H}_2\text{O}$                                                | 0.17@546 nm     | 26               |
| 18 | $(\text{C}_{10}\text{N}_2\text{H}_{10})(\text{HI}_2\text{O}_6)(\text{HIO}_3)(\text{IO}_3)$                                    | 0.171@550 nm    | 27               |
| 19 | $(\text{H}_7\text{C}_5\text{N}_2)_6(\text{V}_{10}\text{O}_{28}) \cdot 2\text{H}_2\text{O}$                                    | 0.219           | 28               |
| 20 | $\text{Cs}_3(\text{H}_2\text{C}_3\text{N}_3\text{O}_3)_3(\text{H}_3\text{C}_3\text{N}_3\text{O}_3) \cdot 3\text{H}_2\text{O}$ | 0.23@1064 nm    | 29               |
| 21 | $\text{Cd}(\text{C}_6\text{H}_4\text{NO}_2)\text{I} \cdot \text{H}_2\text{O}$                                                 | 0.243@550 nm    | 30               |
| 22 | $(\text{C}_3\text{N}_6\text{H}_7)(\text{C}_3\text{N}_6\text{H}_6)\text{HgCl}_3$                                               | 0.246@1064 nm   | 18               |
| 23 | $(\text{H}_7\text{C}_3\text{N}_6) \cdot (\text{H}_6\text{C}_3\text{N}_6)\text{ZnCl}_3$                                        | 0.255@1064 nm   | 31               |
| 24 | $\text{CdF}(\text{C}_6\text{H}_4\text{NO}_2)$                                                                                 | 0.26@546 nm     | 32               |
| 25 | $\text{Sr}_2\text{Zn}(\text{C}_3\text{N}_3\text{O}_3)_2$                                                                      | 0.31@1064 nm    | 33               |
| 26 | $(\text{C}_{12}\text{H}_9\text{N}_2)_2\text{TeBr}_6$                                                                          | 0.31@546nm      | 26               |
| 27 | $(\text{C}_9\text{H}_7\text{NBr})_2(\text{ZnCl}_4)$                                                                           | 0.310 @ 550 nm  | <b>This work</b> |
| 28 | $\text{KLa}_2(\text{C}_3\text{N}_3\text{O}_3)_2\text{Cl}$                                                                     | 0.316@1064      | 34               |
| 29 | $(\text{C}_3\text{H}_8\text{N}_6)\text{PbBr}_4$                                                                               | 0.322 @ 546nm   | 35               |
| 30 | $(\text{C}_{14}\text{H}_{14}\text{N}_2)\text{ZnCl}_4$                                                                         | 0.325 @ 1064 nm | 36               |
| 31 | $[\text{Mg}(\text{H}_2\text{O})_6][(\text{C}_7\text{H}_4\text{NO}_4)\text{H}_2\text{O}]_2$                                    | 0.34 @ 546 nm   | 37               |
| 32 | $(\text{C}_{14}\text{H}_{14}\text{N}_2)\text{CdCl}_4$                                                                         | 0.341 @ 1064 nm | 36               |
| 33 | $(\text{C}_9\text{H}_7\text{NBr})_2(\text{CdCl}_4)$                                                                           | 0.378@550 nm    | <b>This work</b> |
| 34 | $(\text{C}_7\text{H}_{10}\text{N})_3\text{Bi}_2\text{I}_9\text{I}_2$                                                          | 0.39 @ 589 nm   | 38               |
| 35 | $(\text{C}_9\text{H}_7\text{NBr})(\text{CdCl}_3) \cdot \text{H}_2\text{O}$                                                    | 0.405 @ 550 nm  | <b>This work</b> |

## References

- 1 CrysAlisPro, Ver. 1.171.36.28; Agilent Technologies: Santa Clara, CA, 2013.
- 2 Dolomanov, O. V.; Bourhis, L. J.; Gildea, R. J.; Howard, J. A. K.; Puschmann, H. *J. Appl. Cryst.* 2009, **42**, 339–341.
- 3 Bourhis, L. J.; Dolomanov, O. V.; Gildea, R. J.; Howard, J. A. K.; Puschmann, H. *Acta Cryst. A* 2015, **71**, 59–75.
- 4 Sheldrick, G. M. *Acta Cryst. C* 2015, **71**, 3–8.
- 5 Tauc, J. *Mater. Res. Bull.* 1970, **5**, 721–729.
- 6 Clark, S. J.; Segall, M. D.; Pickard, C. J.; Hasnip, P. J.; Probert, M. J.; Refson, K.; Payne, M. C. Z. *Kristallogr. - Cryst. Mater.* 2005, **220**, 567–570.
- 7 Payne, M. C.; Teter, M. P.; Allan, D. C.; Arias, T. A.; Joannopoulos, J. D. *Rev. Mod. Phys.* 1992, **64**, 1045–1097.
- 8 Ceperley, D. M.; Alder, B. J. *Phys. Rev. Lett.* 1980, **45**, 566–569.
- 9 Perdew, J. P.; Zunger, A. *Phys. Rev. B* 1981, **23**, 5048–5079.
- 10 Monkhorst, H. J.; Pack, J. D. *Phys. Rev. B* 1976, **13**, 5188–5192.
- 11 Frisch, M. J. Gaussian 09, Revision B.01, Gaussian, Inc., Wallingford, USA, 2009.
- 12 Lu, T.; Chen, F. *J. Comput. Chem.* 2012, **33**, 580–592.
- 13 Alparone, A. *Chem. Phys.* 2013, **410**, 90–98.
- 14 Zhu, Y. L.; Gou, J.; Yang, C.; Zhu, Q. W.; Xiong, Y.; Wu, Q. D. *Angew. Chem. Int. Ed.* 2025, **64**, DOI: 10.1002/anie.202509290.
- 15 Fang, Z.; Li, C. Q.; Yang, B. P.; Duan, M. H. *Inorg. Chem.* 2024, **63**, 18547–18551.
- 16 Bao, W. X.; Zhou, Z. Q.; Zhang, X. Y.; Fu, R. B.; Tang, H. X.; Ma, Z. J.; Wu, X. T. *J. Alloys Compd.* 2023, **951**, DOI: 10.1016/j.jallcom.2023.169945.
- 17 Fang, Z.; Pan, Y. M.; Han, P.; Yang, B. P.; Duan, M. H. *J. Mater. Chem. C* 2024, **12**, 17482–17489.
- 18 Bai, Z. Y.; Lee, J.; Kim, H.; Hu, C. L.; Ok, K. M. *Small* 2023, **19**, DOI: 10.1002/smll.202301756.
- 19 Jiang, Y. S.; Wei, W.; Jia, H. W.; Arif, M.; Yang, Z. H.; Yan, X. L.; Hou, X. L. *Cryst. Res. Technol.* 2025, **60**, DOI: 10.1002/crat.70034.
- 20 Ding, M. L.; Wu, Q.; Shen, Y. G.; Hong, J. Q.; Dong, G. F.; Ma, L. *Inorg. Chem.* 2024, **63**, 9701–9705.
- 21 Shen, C. Y.; Liu, J.; Sun, D. F.; Yang, K.; Zhang, B. B.; Wu, K.; Wang, J. Y.; Wang, D. L. *Small* 2025, **21**, DOI: 10.1002/smll.202501471.
- 22 Wang, Y.; Shen, Y. G.; Huang, W. Q.; Zhao, S. E. *Dalton Trans.* 2023, **52**, 5423–5426.
- 23 Wang, D. L.; Xing, Q. W.; Sun, D. F.; Zhu, C. R.; Wu, K.; Zhang, B. B.; Liu, G. X.; Wang, J. Y.; Shen, C. Y. *Mater. Adv. Opt. Mater.* 2025, **13**, DOI: 10.1002/adom.202501054.
- 24 Wu, L. L.; Lin, C. S.; Tian, H. T.; Zhou, Y. Q.; Fan, H. X.; Yang, S. D.; Ye, N.; Luo, M. *Angew. Chem. Int. Edit.* 2024, **63**, DOI: 10.1002/anie.202315647.
- 25 Lv, Y. L.; Tang, R. L.; Ma, L.; Chen, C.; Liu, W. L.; Guo, S. P. *Adv. Opt. Mater.* 2025, **13**, DOI: 10.1002/adom.202501839.
- 26 Wang, S. Y.; Zhang, Y. Z.; Yan, Y. X.; Dong, X. H.; Cao, L. L.; Huang, L.; Zou, G. H. *Inorg. Chem.* 2025, **64**, 20490–20497.
- 27 Wang, Y. H.; Jiang, D. X.; Liu, D. X.; Li, F. Y.; Zhao, H.; Pan, J.; Wei, Q.; Wei, L.; Yang, G. Y. *Inorg. Chem.* 2024, **63**, 20774–20780.
- 28 Xiao, D. S.; Zhang, X. Y.; Gong, P. F.; Lin, Z. S.; Hu, Z. G.; Ye, N. *Inorg. Chem.* 2025, **64**, 14041–14047.
- 29 Wang, X. Y.; Wang, D. D.; Liu, Y. J.; Wang, J. H. *CrystEngComm* 2024, **26**, 3948–3953.
- 30 Gou, J.; Yang, C.; Wang, Y. J.; Zhu, Y. L.; Zhu, Q. W.; Su, X.; Wu, Q. *Dalton. Trans.* 2025, **54**, 2916–2921.
- 31 Liu, L. H.; Bai, Z. Y.; Hu, L.; Wei, D. S.; Lin, Z. B.; Zhang, L. Z. *J. Mater. Chem. C* 2021, **9**, 7452–7457.
- 32 Gou, J.; Zhu, Y. L.; Su, X.; Yang, C.; Wang, Y. J.; Zhu, Q. W.; Xiong, Y.; Wu, Q. *Inorg. Chem. Front.* 2025, **12**, 3595–3601.

- 33 Wang, N.; Zhang, X.; Liang, F.; Hu, Z.; Wu, Y. *Inorg. Chem.* 2025, **64**, 2603–2607.
- 34 Wang, N.; Zhang, X.; Liang, F.; Hu, Z.; Wu, Y. *Solid State Commun.* 2025, **398**, 115871.
- 35 Huang, W. Q.; Zhang, X.; Li, Y. Q.; Zhou, Y.; Chen, X.; Li, X. Q.; Wu, F. F.; Hong, M. C.; Luo, J. H.; Zhao, S. G. *Angew. Chem. Int. Edit.* 2022, **61**, DOI: 10.1002/anie.202202746.
- 36 Li, X. H.; Gong, P. F.; Chen, M. X.; Zhuang, S. J.; Qi, M.; Wang, W. Q.; Wang, X. F.; Jia, Z.; Xia, M. J. *Inorg. Chem. Front.* 2025, **12**, 7675–7683.
- 37 Xu, M. B.; Yu, N.; Li, J. J.; Wang, M. C.; Zhuo, M. F.; Du, K. Z.; Chen, J.; Chen, Y. *Inorg. Chem.* 2025, **64**, 6761–6767.
- 38 Zhao, D. X.; Ma, S. H.; Wang, J. J.; Liang, F.; Lu, D. Z.; Wu, K.; Ye, N.; Hu, Z. G. *Inorg. Chem.* 2025, **64**, 20459–20466.
